# Supplementary material for: Characterizations of a Class-I BASIC PENTACYSTEINE Gene Reveal Conserved Roles in the Transcriptional Repression of Genes Involved in Seed Development
Source: MDPI journal article supplement (doi:10.3390/cimb44090278), 2022-09-07

## Supplementary Tables

**Supple. Table. S1 The primer sequences used for qRT-PCR amplification.**

Table S1 The primer sequences used for qRT-PCR amplification

| <b>Primer usage</b>                                               | <b>Forward primer sequence (5'-3')</b>  | <b>Reverse primer sequence (5'-3')</b>  |
|-------------------------------------------------------------------|-----------------------------------------|-----------------------------------------|
| <b><i>CjBPC1</i> RT-PCR</b>                                       | CCCATACCGGTTTGCTCTTG                    | ACCACATCCCCATCGGTAAC                    |
| <b><i>CjBPC2</i> RT-PCR</b>                                       | TCCCACCGCCCTCAAAA                       | TCAGCCCCGGTGGACAT                       |
| <b><i>CjBPC3</i> RT-PCR</b>                                       | GAAGAACGCAGCTGTTGAAGA<br>A              | TCCTCTATGGCTGCATTTTTT<br>TC             |
| <b><i>CjBPC4</i> RT-PCR</b>                                       | TTACTGATGCACCCCCAATGT                   | TTTAGTCCGCCTAGGCTTTGC                   |
| <b><i>CjBPC5</i> RT-PCR</b>                                       | TGCAGCCGAGGGTCATG                       | TGGCCCAGTGATCCTTGAG                     |
| <b><i>CjBPC6</i> RT-PCR</b>                                       | ACCCGGTATTGCTGCTGTTC                    | TCTCTGCCGGCTCAGACATA                    |
| <b><i>GAPDH</i><br/>internal<br/>reference</b>                    | GGGAATCCTTGTTACACTGAG                   | ACCCCATTCGTTGTCATACC                    |
| <b><i>CjBPC1</i> full-length cloning</b>                          | AGCACAGTACTGCAATGCCT                    | AACAGACCAGATGCGATGGG                    |
| <b><i>CjBPC2</i> full-length cloning</b>                          | GCTTCAGTTTCGGCAGTCCA                    | AAACAGACCACGAGCACTGG                    |
| <b><i>CjBPC3</i> full-length cloning</b>                          | ATGGATGACGGTGGGAAAC                     | CTTGATGGTAATGTAGCGAT<br>TTG             |
| <b><i>CjBPC4</i> full-length cloning</b>                          | ATGGATGCCAGTGGGCATC                     | CACGATATCCCAGTAGTACG<br>CA              |
| <b><i>CjBPC5</i> full-length cloning</b>                          | AGATGGATTTTTAGTGGTTTCC<br>CT            | CACGATATCCCAGTAGTACG<br>CA              |
| <b><i>CjBPC6</i> full-length cloning</b>                          | ATGGGGACACACCACGATAG                    | TTACTTAATTGTAACAAAC                     |
| <b><i>CjBPC1</i><br/>EXCLONE<br/>adaptor</b>                      | tcagcagtgaagagcATGGCTCAATCT<br>GTAGTTTC | ttagcgtgtgaagagcCCTGATTGTC<br>ACAAACTTG |
| <b><i>Transgenic</i><br/>validation PCR<br/><i>Hygromycin</i></b> | TGACCTATTGCATCTCCCGC                    | ATTTGTGTACGCCCCGACAGT                   |
| <b><i>CjBPC1-F1/R1</i></b>                                        | CCCATACCGGTTTGCTCTTG                    | ACCACATCCCCATCGGTAAC                    |
| <b><i>CjBPC1-F2/R2</i></b>                                        | CGAGATTGTGCGGTTTCAGA                    | GGTTTACCCAACTATCCCTCA<br>CAT            |
| <b><i>ACTIN</i><br/>reference in<br/><i>Arabidopsis</i></b>       | AAGGAGAAGAAGGAGAAGGA<br>ACAG            | CAAGGAGTGCAATGACTGTG<br>AGATA           |

|                               |                                |                                 |
|-------------------------------|--------------------------------|---------------------------------|
| <i>AtSTK</i> <b>RT-PCR</b>    | GTTCTGATAGCACCAACACTAG<br>C    | ACTCATGCTTCTTGGACCTGA<br>TC     |
| <i>AtABI3</i> <b>RT-PCR</b>   | AAGCAAAGCGACGTGGGTAA           | GTGTGTCTCAGCTTCTTTTTT<br>TGG    |
| <i>AtFUS3</i> <b>RT-PCR</b>   | GCTCACTTGCCGGCACTT             | AACCGTCCAAATCTTCCATTC<br>TT     |
| <i>AtLEC2</i> <b>RT-PCR</b>   | TGGCAAGAGAGAGGTGGTTTTTC        | TCCTGTTGATCCTTGCCATCT           |
| <i>AtSTK</i> <b>ChIP-PCR</b>  | CGTCTGCGAAAAACCGAGCT           | GGACCAATACCTTCATTGTA<br>CTTTGAA |
| <i>AtABI3</i> <b>ChIP-PCR</b> | GCCTCCTTACTCACATACAAAC<br>CC   | TCATCAGCGTCTCCACCGAG<br>TATT    |
| <i>AtFUS3</i> <b>ChIP-PCR</b> | CGACGTATGATACTCCCGAAGG<br>TGAT | ATCCCTTCCTTGCATTCAAGT<br>GCC    |
| <i>AtLEC2</i> <b>ChIP-PCR</b> | CGCTCGCACTTCACAACAGTCC         | TCATCACCGCCGCCATCTGC            |

**Supple. Table. S2 Characteristics of the *BASIC PENTACYSTEINE* family in *Camellia japonica*.**

TableS2 Characteristics of the BASIC PENTACYSTEINE family in *Camellia japonica*

| Gene name     | GeneBank ID | Length<br>(aa) | Molecular<br>weight<br>(KD) | PI   | Subcellular<br>location |
|---------------|-------------|----------------|-----------------------------|------|-------------------------|
| <i>CjBPC1</i> | OL631154    | 289            | 32.0                        | 9.40 | Nuclear                 |
| <i>CjBPC2</i> | OL631155    | 298            | 32.6                        | 9.67 | Nuclear                 |
| <i>CjBPC3</i> | OL888113    | 312            | 34.9                        | 9.03 | Nuclear                 |
| <i>CjBPC4</i> | OL888114    | 332            | 37.1                        | 9.53 | Nuclear                 |
| <i>CjBPC5</i> | OL888115    | 305            | 34.1                        | 8.81 | Nuclear                 |
| <i>CjBPC6</i> | OL888116    | 232            | 25.1                        | 9.68 | Nuclear                 |

Supplementary Figures

**Figure. S1: the details of conserved motifs in BPC proteins.** The upper panel indicates the distribution of motifs that are presented by colored boxes. The lower panel lists the detailed conserved amino acids of each motif.

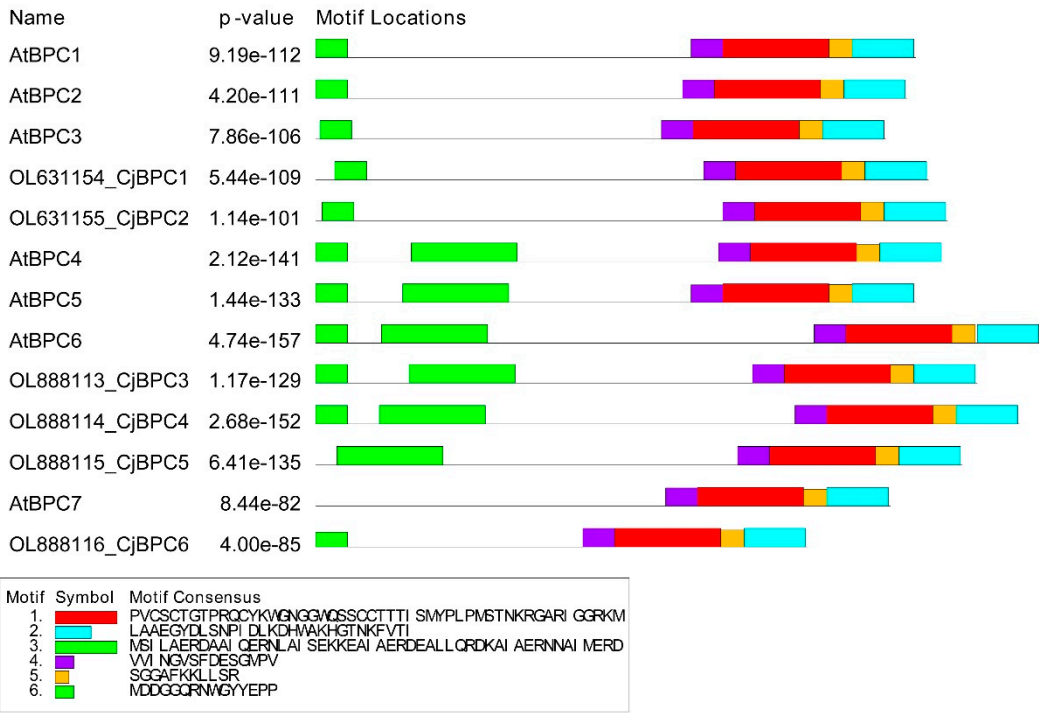

**Figure. S2 Expression profiles of CjBPC genes in different tissues of *Camellia japonica*.**

The expression *CjBPCs* in differe floral tissues of *Camellia japonica*. The expression is measured by the fragments per kilobase per million (FPKM). Three biological replicates are used for the expression analysis as described. CjYL, young leaves; CjFB, floral buds; CjPE, petal; CjEM, fruit endocarp; CjSD, Seed.

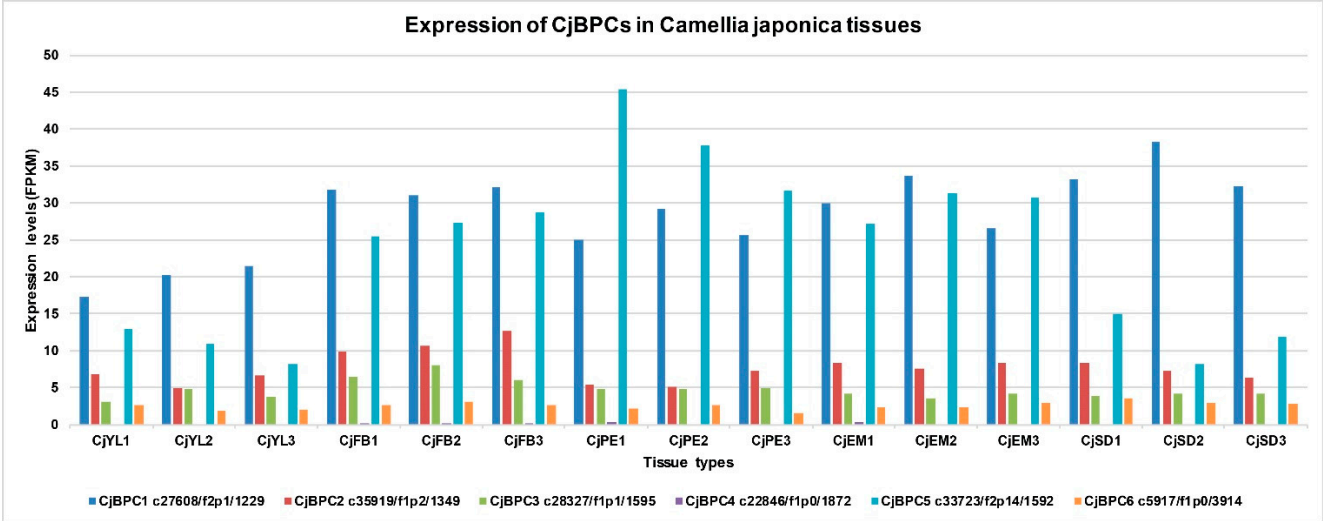

**Figure. S3 Overexpression of *CjBPC1* in Arabidopsis and molecular validation of transgenic lines. A, the diagram of overexpression construct for Arabidopsis transformation. B, the PCR verification positive T1 transgenic lines. C, the relative expression of *CjBPC1* in different transgenic lines using gene-specific primers.**

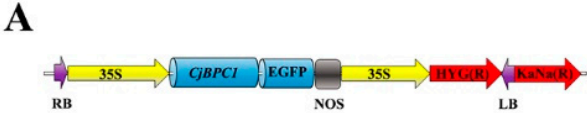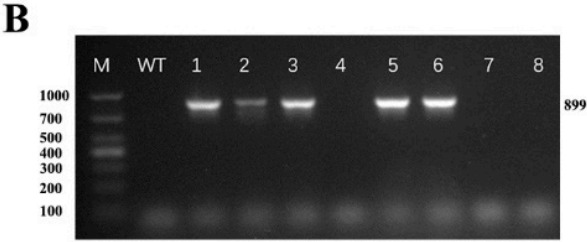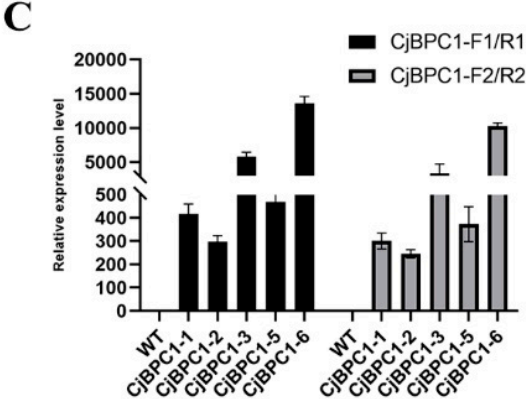

Supplement: s1 [file s1]
